# Supplementary material
Source: PubMed Central journal article supplement (PMC4438250)
Supplement: MCB.01414-14_zmb999100855so1.pdf [file MCB.01414-14_zmb999100855so1.pdf]

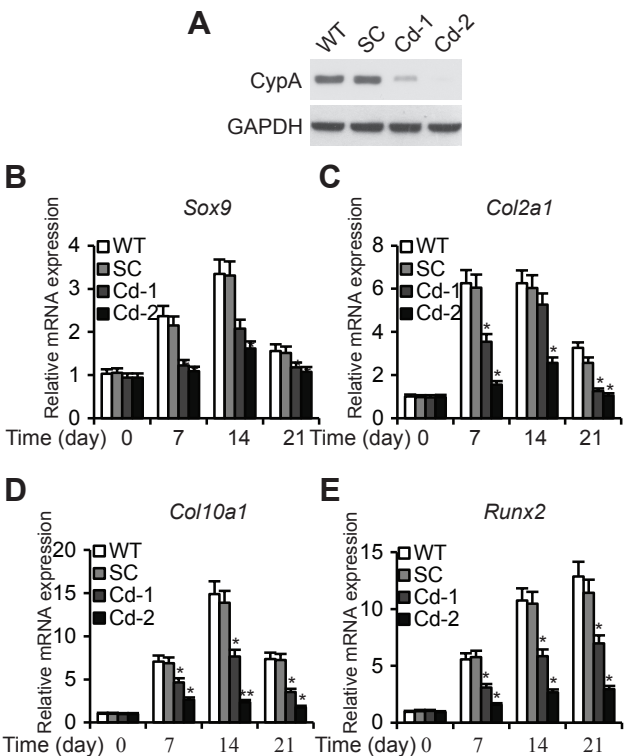

Supplemental Figure 1. Knockdown of CypA attenuates chondrogenic differentiation of C3H10T1/2 cells. (A) Western blot analyses of CypA expression levels. Cell lysates prepared from WT, SC, cd-1 and cd-2 C3H10T1/2 cells were immunoblotted to detect CypA expression levels. (B-E) Chondrogenic differentiation of C3H10T1/2 WT, SC, and Kd stable clones, cd-1 and cd-2 cells. Relative mRNA expression levels of Sox9 (B), Col2a1 (C), Col10a1 (D) and Runx2 (E) were determined by qRT-PCR at several time points in the course of chondrogenic differentiation. \*P < 0.05, \*\*P < 0.01 compared to WT cells at the same time-points. Data are shown as mean  $\pm$  SD of three experiments.
